# Supplementary material for: Vertical wind retrieved by airborne lidar and analysis of island induced gravity waves in combination with numerical models and in-situ particle measurements
Source: Copernicus journal article supplement (doi:10.5194/acp-2015-1014), 2016-01-19
Supplement: Supplementary file 1 [file acp-2015-1014-supplement.pdf]

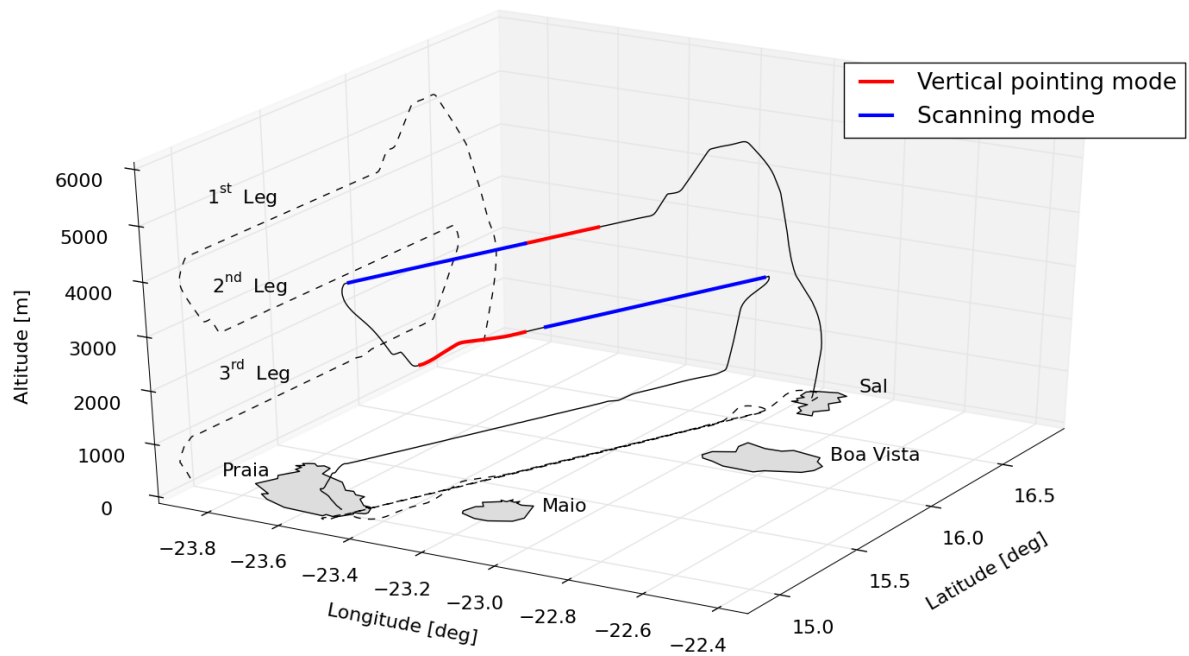

Figure S1. Track corresponding to the flight on 17 June between Sal and Praia, Cape Verde islands. The blue segments represent flight periods during which the DWL was operating in scanning mode (horizontal wind speed), while the red segments correspond to vertical pointing mode (vertical wind).

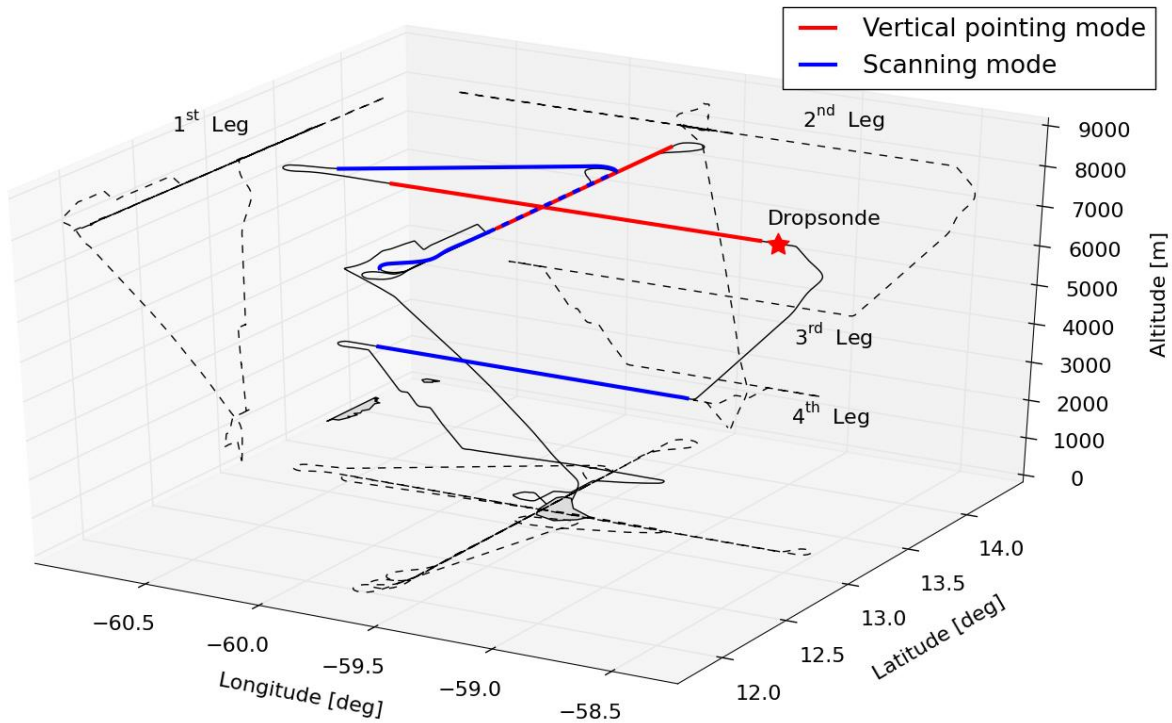

Figure S2. Track corresponding to the flight on 26 June around Barbados. The blue segments represent flight periods during which the DWL was operating in scanning mode (horizontal wind speed), while the red segments correspond to vertical pointing mode (vertical wind). The dropsonde (Fig. 10) launch position is indicated with a red star.
